# Supplementary material for: Opportunities and Challenges to Improve a Public Research Program in Plant Breeding and Enhance Underutilized Plant Genetic Resources in the Tropics
Source: MDPI journal article supplement (doi:10.3390/genes12101584), 2021-10-09
Supplement: s1 [file s1]

**Appendix 1. The survey questions of the study, presented in Spanish (original) and English (translation). The initials PB&PGR means plant breeding and plant genetic resources.**

| <b>Español</b>                                                                                                                                                                                                                                                                                                                                                                                                                                                                                                                                                                                                                                                                                                                                                                                                                                                                                                                                                 | <b>English</b>                                                                                                                                                                                                                                                                                                                                                                                                                                                                                                                                                                                                                                                                                                                                                                  |
|----------------------------------------------------------------------------------------------------------------------------------------------------------------------------------------------------------------------------------------------------------------------------------------------------------------------------------------------------------------------------------------------------------------------------------------------------------------------------------------------------------------------------------------------------------------------------------------------------------------------------------------------------------------------------------------------------------------------------------------------------------------------------------------------------------------------------------------------------------------------------------------------------------------------------------------------------------------|---------------------------------------------------------------------------------------------------------------------------------------------------------------------------------------------------------------------------------------------------------------------------------------------------------------------------------------------------------------------------------------------------------------------------------------------------------------------------------------------------------------------------------------------------------------------------------------------------------------------------------------------------------------------------------------------------------------------------------------------------------------------------------|
| <b>Descripción del grupo</b>                                                                                                                                                                                                                                                                                                                                                                                                                                                                                                                                                                                                                                                                                                                                                                                                                                                                                                                                   | <b>Group description</b>                                                                                                                                                                                                                                                                                                                                                                                                                                                                                                                                                                                                                                                                                                                                                        |
| <p>Nombre</p> <p>Género (femenino, masculino, otro)</p> <p>Rango de edad (20-30, 31-40, 41-50, 51-60, 61-70)</p> <p>Último estudio terminado (pregrado, especialización, maestría, doctorado)</p> <p>Escalafón dentro de AGROSAVIA (profesional de apoyo, profesional de apoyo a la investigación, consultor, Investigador master, Investigador master asociado, investigador master senior, Investigador PhD, investigador PhD asociado)</p> <p>¿Su último estudio lo realizó fuera de Colombia? (sí, no)</p>                                                                                                                                                                                                                                                                                                                                                                                                                                                 | <p>Name</p> <p>Gender (male, female, other)</p> <p>Age range (20-30, 31-40, 41-50, 51-60, 61-70)</p> <p>Highest academic degree (bachelor's degree, graduate certificate degree, M.Sc., Ph.D.)</p> <p>AGROSAVIA's rank (research professional, research support professional, consultant, M.Sc. Researcher, M.Sc. Associate researcher, M.Sc. Senior researcher, PhD.D. Researcher, Ph.D. Associate researcher)</p> <p>Did you last study is abroad? (yes, no)</p>                                                                                                                                                                                                                                                                                                              |
| <b>Retos y oportunidades en el area PB&amp;PGR</b>                                                                                                                                                                                                                                                                                                                                                                                                                                                                                                                                                                                                                                                                                                                                                                                                                                                                                                             | <b>Challenges and opportunities in the PB&amp;PGR area</b>                                                                                                                                                                                                                                                                                                                                                                                                                                                                                                                                                                                                                                                                                                                      |
| <p>Por favor mencione los cultivos en que usted ha desarrollado actividades de fitomejoramiento dentro de los últimos 10 años</p> <p>Mencione los cultivos más importantes en los que AGROSAVIA debe trabajar en mejoramiento genético a futuro</p> <p>Por favor mencione los métodos o sistemas de mejoramiento que ha aplicado en sus programas de mejoramiento en los últimos 10 años</p> <p>¿Cuántas veces ha solicitado accesiones al banco de germoplasma de la nación en los últimos 10 años?</p> <p>El grupo de investigadores PB&amp;PGR debería participar en la formación y entrenamiento de estudiantes y nuevos profesionales (Totalmente en desacuerdo, en desacuerdo, neutro, de acuerdo, totalmente de acuerdo)</p> <p>El grupo de investigadores PB&amp;PGR debería propiciar espacios abiertos para clubes de revistas y discusión en investigación (Totalmente en desacuerdo, en desacuerdo, neutro, de acuerdo, totalmente de acuerdo)</p> | <p>Please mention the crops in which you have developed breeding activities within the last 10 years</p> <p>Please mention the most important crops in which AGROSAVIA should work on genetic improvement in the future</p> <p>Please mention the breeding methods you have applied in your breeding programs in the last 10 years</p> <p>How many times have you requested accessions from the nation's germplasm bank in the last 10 years?</p> <p>The PB&amp;PGR group should participate in advising and training students and young professionals (Strongly disagree, disagree, neutral, agree, strongly agree)</p> <p>The PB&amp;PGR group should open spaces for journal clubs and research discussion (Strongly disagree, disagree, neutral, agree, strongly agree)</p> |

|                                                                                                                                                                                          |                                                                                                                                                                     |
|------------------------------------------------------------------------------------------------------------------------------------------------------------------------------------------|---------------------------------------------------------------------------------------------------------------------------------------------------------------------|
| Los estudiantes y profesionales jóvenes tienen un buen conocimiento de genética cuantitativa (Totalmente en desacuerdo, en desacuerdo, neutro, de acuerdo, totalmente de acuerdo)        | Students and young professionals have a good knowledge of quantitative genetics (Strongly disagree, disagree, neutral, agree, strongly agree)                       |
| Los estudiantes y profesionales jóvenes tienen un buen conocimiento del trabajo de campo (Totalmente en desacuerdo, en desacuerdo, neutro, de acuerdo, totalmente de acuerdo)            | Students and young professionals have a good understanding of fieldwork (Strongly disagree, disagree, neutral, agree, strongly agree)                               |
| Los investigadores PB&PGR tienen un buen conocimiento en selección asistida por marcadores (Totalmente en desacuerdo, en desacuerdo, neutro, de acuerdo, totalmente de acuerdo)          | PB&PGR researchers have a good understanding of MAS (Marker-Assisted Selection) (Strongly disagree, disagree, neutral, agree, strongly agree)                       |
| Los investigadores PB&PGR tienen un buen conocimiento en diseño de experimentos (Totalmente en desacuerdo, en desacuerdo, neutro, de acuerdo, totalmente de acuerdo)                     | PB&PGR researchers have a good knowledge of experimental design (Strongly disagree, disagree, neutral, agree, strongly agree)                                       |
| Los investigadores PB&PGR tienen un buen conocimiento en modelos de interacción genotipo x ambiente (Totalmente en desacuerdo, en desacuerdo, neutro, de acuerdo, totalmente de acuerdo) | PB&PGR researchers have a good understanding of G (Genetic) x E (Environment) models (Strongly disagree, disagree, neutral, agree, strongly agree)                  |
| Los investigadores PB&PGR tienen un buen conocimiento en genética cuantitativa? (Totalmente en desacuerdo, en desacuerdo, neutro, de acuerdo, totalmente de acuerdo)                     | PB&PGR researchers have a good understanding of quantitative genetics (Strongly disagree, disagree, neutral, agree, strongly agree)                                 |
| Los investigadores PB&PGR tienen un buen conocimiento en mejoramiento molecular (Totalmente en desacuerdo, en desacuerdo, neutro, de acuerdo, totalmente de acuerdo)                     | PB&PGR researchers have a good knowledge of molecular plant breeding (Strongly disagree, disagree, neutral, agree, strongly agree)                                  |
| Los investigadores PB&PGR tienen un buen conocimiento en mejoramiento genético participativo (Totalmente en desacuerdo, en desacuerdo, neutro, de acuerdo, totalmente de acuerdo)        | PB&PGR researchers have a good understanding of participatory plant breeding (Strongly disagree, disagree, neutral, agree, strongly agree)                          |
| Si tiene comentarios o sugerencias para mejorar la configuración del grupo PG&PGR por favor escribalos en esta sección.                                                                  | If you have comments or suggestions to improve the configuration of the PG&PGR group please write them in this section                                              |
| <b>Conexiones dentro del grupo PB&amp;PGR y externos</b>                                                                                                                                 | <b>Links within the PB&amp;PGR group and externals</b>                                                                                                              |
| Por favor mencione los investigadores dentro de la corporación con los que usted más frecuentemente ha ejecutado sus proyectos en                                                        | Please mention the researchers within the corporation with whom you have most frequently executed your projects in genetics and plant breeding in the last 10 years |

|                                                                                                                                                                                                                                                                                                                                                                                                                                                                                                                                                                                                                                                                                                                                                                                                                                                                                                                                                                                                                                                                                                                                                                                                                                                          |                                                                                                                                                                                                                                                                                                                                                                                                                                                                                                                                                                                                                                                                                                                                                                                                                                                                                                                                                                                                                                                                 |
|----------------------------------------------------------------------------------------------------------------------------------------------------------------------------------------------------------------------------------------------------------------------------------------------------------------------------------------------------------------------------------------------------------------------------------------------------------------------------------------------------------------------------------------------------------------------------------------------------------------------------------------------------------------------------------------------------------------------------------------------------------------------------------------------------------------------------------------------------------------------------------------------------------------------------------------------------------------------------------------------------------------------------------------------------------------------------------------------------------------------------------------------------------------------------------------------------------------------------------------------------------|-----------------------------------------------------------------------------------------------------------------------------------------------------------------------------------------------------------------------------------------------------------------------------------------------------------------------------------------------------------------------------------------------------------------------------------------------------------------------------------------------------------------------------------------------------------------------------------------------------------------------------------------------------------------------------------------------------------------------------------------------------------------------------------------------------------------------------------------------------------------------------------------------------------------------------------------------------------------------------------------------------------------------------------------------------------------|
| <p>genética y fitomejoramiento en los últimos 10 años</p> <p>Por favor mencione los investigadores dentro de la corporación con los que usted más frecuentemente ha consultado o pedido asesoría técnica en sus investigaciones en los últimos 10 años</p> <p>Por favor mencione los investigadores dentro de la corporación con los que usted más frecuentemente ha escrito sus artículos científicos o material divulgativo en los últimos 10 años</p> <p>Por favor mencione los investigadores dentro de la corporación con los que usted más frecuentemente ha registrado sus nuevas variedades en los últimos 10 años</p> <p>Por favor mencione los investigadores dentro de la corporación con los que usted más frecuentemente ha discutido los mas recientes avances en el area del fitomejoramiento y la genética vegetal en los últimos 10 años</p> <p>Por favor mencione los investigadores dentro de la corporación con los que usted más frecuentemente ha intercambiado y/o solicitado germoplasma de sus programas de mejoramiento en los últimos 10 años</p> <p>Mencione las instituciones fuera de AGROSAVIA con quienes a usted le gustaría y/o le parece estratégico trabajar en el futuro cercano en fitomejoramiento y genética</p> | <p>Please list the researchers within the corporation with whom you have most frequently consulted or sought technical advice on your research in the last 10 years</p> <p>Please list the researchers within the corporation with whom you have most frequently written your scientific articles or dissemination material in the last 10 years</p> <p>Please list the researchers within the corporation with whom you have most frequently registered your new varieties in the last 10 years</p> <p>Please list the researchers within the corporation with whom you have most frequently discussed the most recent advances in plant breeding and plant genetics in the last 10 years</p> <p>Please list the researchers within the corporation with whom you have most frequently exchanged and/or requested germplasm from your breeding programs in the last 10 years</p> <p>Please mention the institutions outside AGROSAVIA with whom you would like and/or think it is strategic to work with in the near future in plant breeding and genetics</p> |
|----------------------------------------------------------------------------------------------------------------------------------------------------------------------------------------------------------------------------------------------------------------------------------------------------------------------------------------------------------------------------------------------------------------------------------------------------------------------------------------------------------------------------------------------------------------------------------------------------------------------------------------------------------------------------------------------------------------------------------------------------------------------------------------------------------------------------------------------------------------------------------------------------------------------------------------------------------------------------------------------------------------------------------------------------------------------------------------------------------------------------------------------------------------------------------------------------------------------------------------------------------|-----------------------------------------------------------------------------------------------------------------------------------------------------------------------------------------------------------------------------------------------------------------------------------------------------------------------------------------------------------------------------------------------------------------------------------------------------------------------------------------------------------------------------------------------------------------------------------------------------------------------------------------------------------------------------------------------------------------------------------------------------------------------------------------------------------------------------------------------------------------------------------------------------------------------------------------------------------------------------------------------------------------------------------------------------------------|
